# Supplementary material
Source: Springer Nature journal article supplement (https://www.springermedizin.de/resource/supplementary/12889_2013_6787_MOESM1_ESM.pdf/9499056)
Supplement: MOESM1 [file 9499056]

### Community Level Variables

Cluster type  
Region/ province

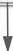

### Socio-economic Status

Maternal marital status  
Polygynous marriage  
Parental education  
Parental occupation  
Household wealth index  
Fuel used for cooking

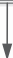

### Proximate Determinants

Maternal factor – Age at childbirth  
Neonatal factor – Sex, Birth size, Birth rank and birth interval  
Pre-delivery factor – Desire for pregnancy, Antenatal care services by type of providers, Iron-folic acid supplementation  
Delivery factor – Delivery assistance, Delivery complications, Mode of delivery, Place of delivery  
Post-delivery factor – Postnatal care

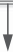

SURVIVE

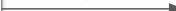

DIED
